# Supplementary material for: Exogenous abscisic acid prolongs the dormancy of recalcitrant seed of Panax notoginseng
Source: PubMed Central journal article supplement (PMC9971733; doi:10.3389/fpls.2023.1054736), 2023-02-14

## SUPPLEMENTARY FIGURES

**FIGURE S1.** Gene expression distribution. The distribution of gene expression levels for different samples is illustrated by box plots. The X-axis represents sample names, the Y-axis on the left indicates the  $\log_2(\text{FPKM} + 1)$ . The Box plots for each region are plotted against five statistics (maximum, upper quartile, median, lower quartile and minimum).

**FIGURE S2.** Pearson correlation analysis of gene expression levels between samples. The X-axis and Y-axis in the graph are the squares of the correlation coefficients for each sample.

**FIGURE S3.** GO functional annotation of differentially expressed genes (DEGs) in the control and high concentration ABA-treated (HA) *P. notoginseng* seeds during after-ripening process. Top 30 most enriched GO terms of DEGs between CK\_0 vs HA\_0.

**FIGURE S4.** KEGG enrichment analysis of differentially expressed genes (DEGs) in the control and HA treated *P. notoginseng* seeds during after-ripening process. (A) Top 20 most enriched KEGG pathways of up-regulated genes between CK\_0 vs HA\_0. (B) Top 20 most enriched KEGG pathways of down-regulated genes between CK\_0 vs HA\_0. (C) Top 20 most enriched KEGG pathways of down-regulated genes between CK\_30 vs HA\_30. (D) Top 20 most enriched KEGG pathways of down-regulated genes between CK\_50 vs HA\_50.

**FIGURE S5.** KEGG signaling pathway network analysis for plant hormone signaling transduction in the control and HA treated *P. notoginseng* seeds at 30 days after-ripening process. Red indicates up-regulation of gene expression, green indicates down-regulation of gene expression.

**FIGURE S6.** KEGG signaling pathway network analysis for MAPK signaling pathway-plant in the control and HA treated *P. notoginseng* seeds at 30 days after-ripening process. Red indicates up-regulation of gene expression, green indicates down-regulation of gene expression.

Figure S1

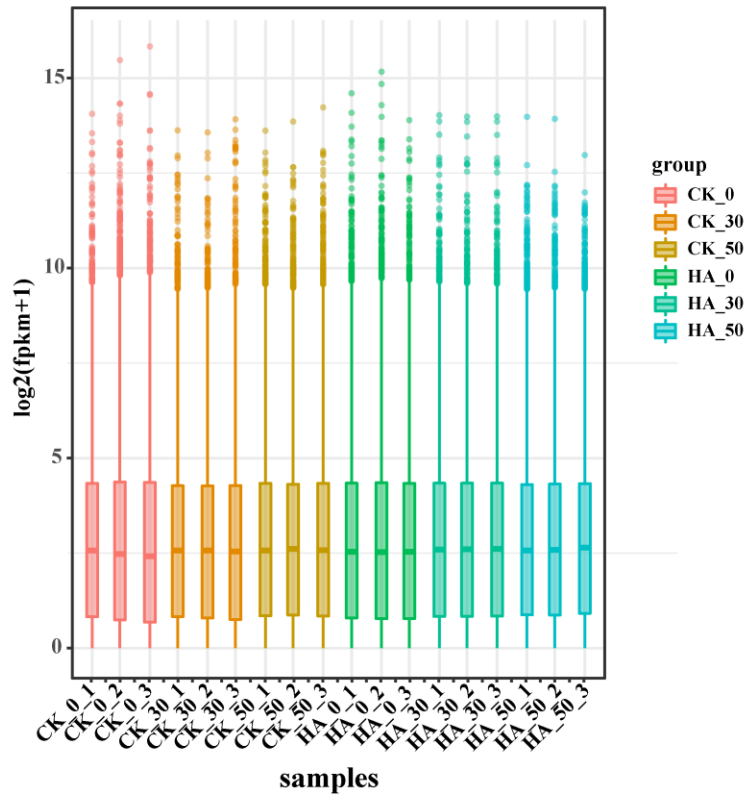

Figure S2

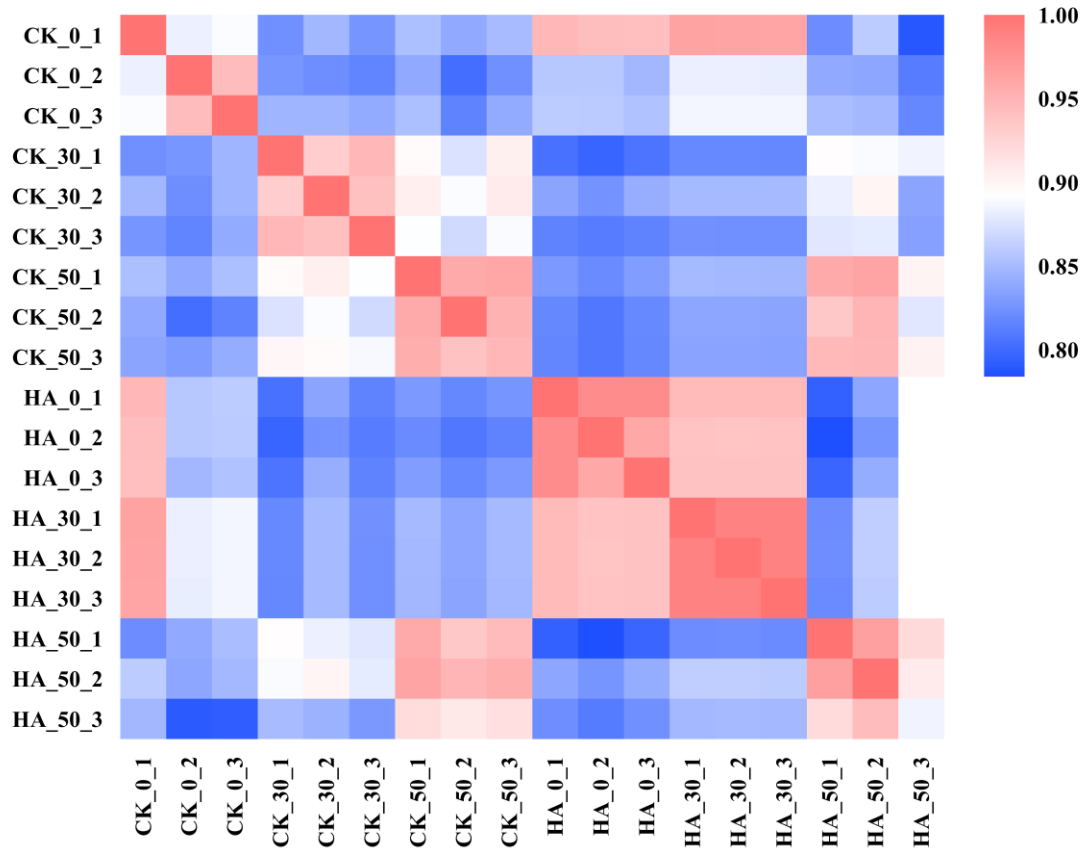

Figure S3

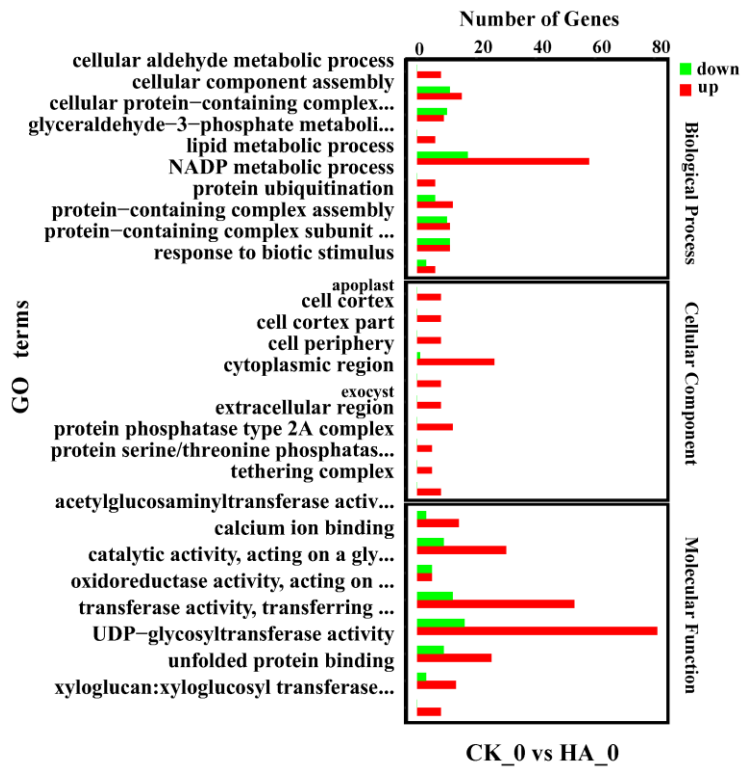

Figure S4

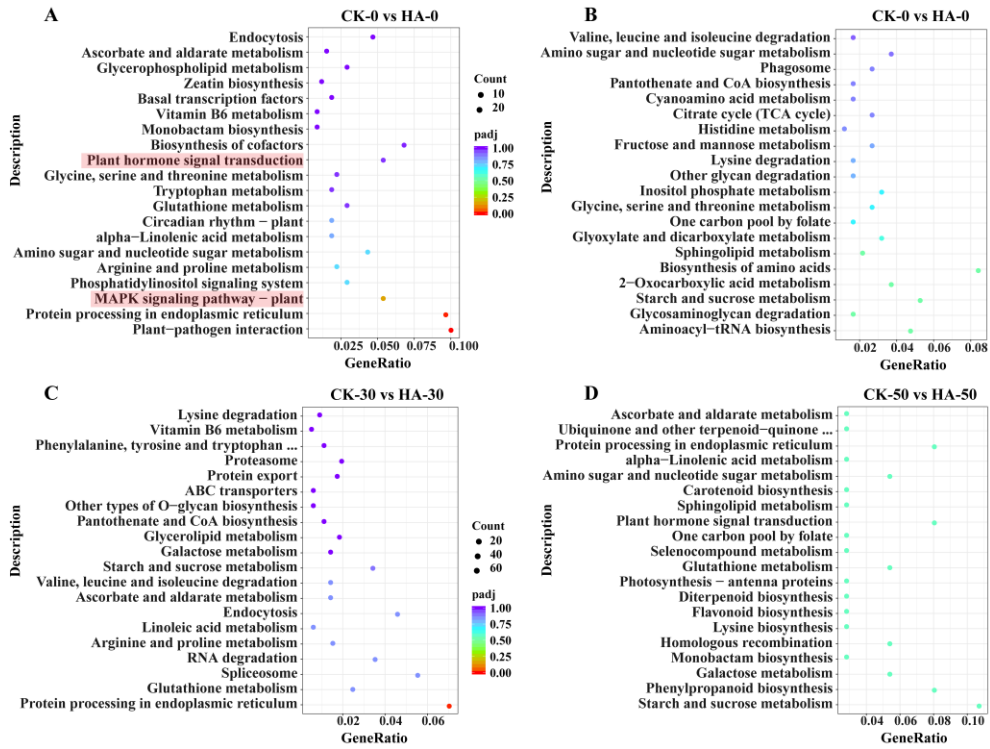

Figure S5

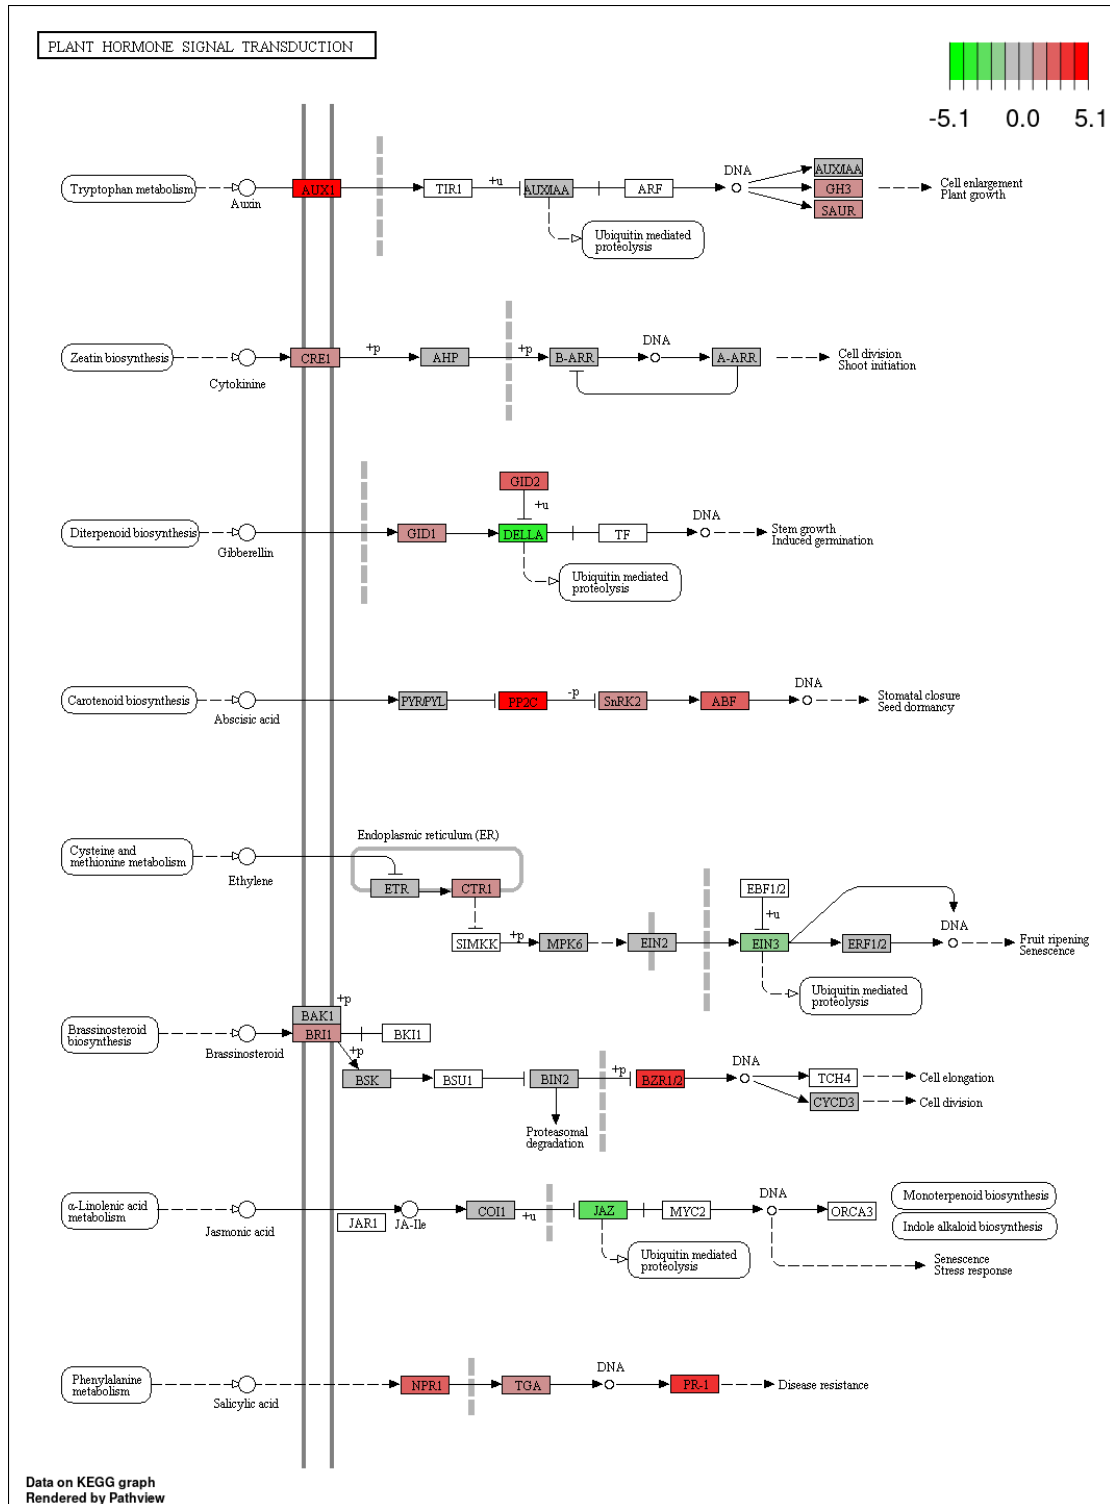

Figure S6

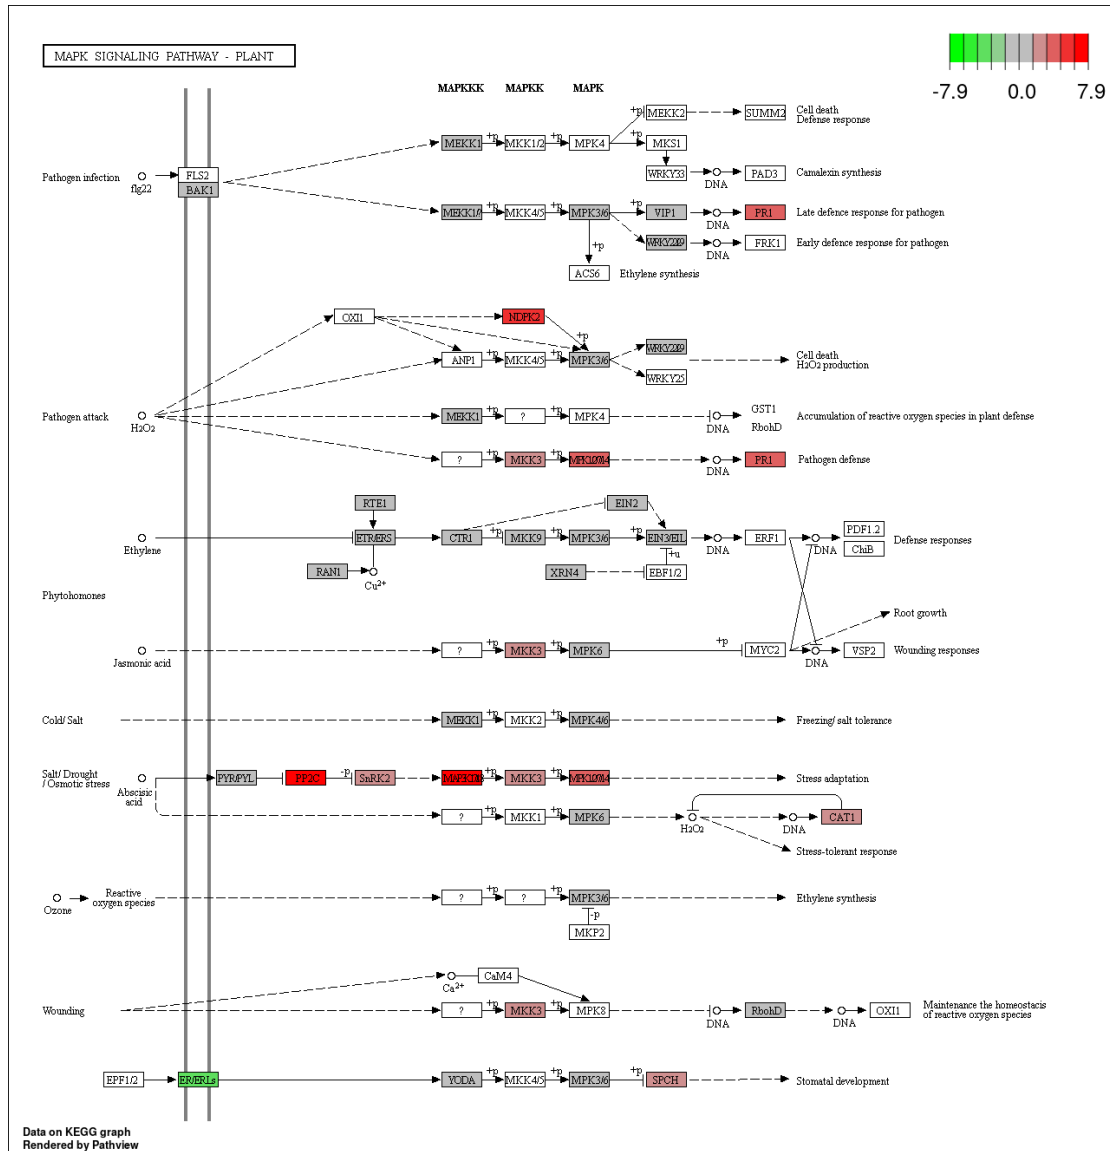

Supplement: DataSheet_1.pdf [file DataSheet_1.pdf]
